# Supplementary material for: To Kill or to Repel Mosquitoes? Exploring Two Strategies for Protecting Humans and Reducing Vector-Borne Disease Risks by Using Pyrethroids as Spatial Repellents
Source: MDPI journal article supplement (doi:10.3390/pathogens10091171), 2021-09-11
Supplement: s1 [file s1]

## Supplementary materials

**Table S1.** Parameters used in the Scenario 1 ConsExpo model.

| Parameter                                                       | Value |
|-----------------------------------------------------------------|-------|
| <b>AS concentration (% [w/w])</b>                               | 0.104 |
| Potential body exposure (mg/min) <sup>1</sup>                   | 45.20 |
| Potential hand exposure (mg/min) <sup>1</sup>                   | 64.7  |
| Potential inhalation exposure (mg/m <sup>3</sup> ) <sup>1</sup> | 35.9  |
| Inhalation/respiration rate (m <sup>3</sup> /h) <sup>2</sup>    | 1.25  |
| Application duration (s) <sup>3</sup>                           | 9     |
| Dermal absorption (%) <sup>4</sup>                              | TFT   |
| Body mass (kg) <sup>2</sup>                                     | 60    |

<sup>1</sup>Default BHHHEM value [38]

<sup>2</sup>Recommendation no. 14 of the Biocidal Products Committee (BPC) Ad hoc Working Group on Human Exposure—default values when assessing human exposure to biocidal products [40]

<sup>3</sup>Recommended spray duration based on mode of use

<sup>4</sup>Default value based on EFSA guidance on dermal absorption [82]

**Table S2.** Parameters used in the Scenario 2 ConsExpo model.

| Parameters                                    | Value   |
|-----------------------------------------------|---------|
| <b>AS concentration (% [w/w])</b>             | 0.104   |
| Vapour pressure (kPa)                         | TFT     |
| Molar mass (g/mol)                            | TFT     |
| Product amount (g) <sup>1</sup>               | 12.3    |
| Emission duration (h) <sup>1</sup>            | 24      |
| Exposure duration (min) <sup>1</sup>          | 720     |
| Room volume (m <sup>3</sup> ) <sup>2</sup>    | 30      |
| Ventilation rate (1/h) <sup>2</sup>           | 0.5     |
| Mass transfer coefficient (m/hr) <sup>3</sup> | 10      |
| Release area (m <sup>2</sup> ) <sup>2</sup>   | 12      |
| Body mass (kg) <sup>4</sup>                   | Adult   |
|                                               | Toddler |

<sup>1</sup>Product-specific information

<sup>2</sup>Pest Control Products Fact Sheet [39]

<sup>3</sup>Cleaning Products Fact Sheet—2018 update [83]

<sup>4</sup>Recommendation no. 14 of the BPC Ad hoc Working Group on Human Exposure—default values when assessing human exposure to biocidal products [40]

**Table S3.** Parameters used in the Scenario 3 ConsExpo model.

| Parameters                                               |          | Value   |
|----------------------------------------------------------|----------|---------|
| <b>AS concentration (% [w/w])</b>                        |          | 0.104   |
| Dislodgeable residues <sup>1</sup> (mg/cm <sup>2</sup> ) | Outdoors | 0.0574  |
| Skin surface area (cm <sup>2</sup> ) <sup>2</sup>        | Adult    | 9,550   |
|                                                          | Toddler  | 2,419.2 |
| Surface contamination (%)                                |          | 100     |
| Dermal absorption (%) <sup>3</sup>                       |          | 70      |
| Body mass (kg) <sup>4</sup>                              | Adult    | 60      |
|                                                          | Toddler  | 10      |

<sup>1</sup>Default values from ECHA Technical Notes for Guidance Part 2 (p. 257; in cases of non-professional use and residential exposure to biocides) [84]

<sup>2</sup>Based on recommendation no. 14 of the BPC Ad hoc Working Group on Human Exposure [40], where skin surface areas were calculated as follows:

adults: 820 cm<sup>2</sup> for hands + 2,270 cm<sup>2</sup> for arms + 1,130 cm<sup>2</sup> for feet + 5,330 cm<sup>2</sup> for legs = 9,550 cm<sup>2</sup>

toddlers: 230.4 cm<sup>2</sup> for hands + 681.6 cm<sup>2</sup> for arms + 288 cm<sup>2</sup> for feet + 1,219.2 cm<sup>2</sup> for legs = 2,419.2 cm<sup>2</sup>

<sup>3</sup>Default value from EFSA guidance on dermal absorption [82]

<sup>4</sup>Recommendation no. 14 of the BPC Ad hoc Working Group on Human Exposure—default values when assessing human exposure to biocidal products [40]

**Table S4.** Parameters used in the Scenario 4 ConsExpo model.

| Parameters                                                 |          | Value  |
|------------------------------------------------------------|----------|--------|
| <b>AS concentration (% [w/w])</b>                          |          | 0.104  |
| Dislodgeable residues <sup>1</sup> (mg/cm <sup>2</sup> )   | Outdoors | 0.0574 |
| Surface area of fingertips (cm <sup>2</sup> ) <sup>2</sup> |          | 4      |
| Efficiency of removal by saliva from skin (%) <sup>3</sup> |          | 50     |
| Number of hand-to-mouth contacts (per day) <sup>3</sup>    |          | 36     |
| Oral absorption (%) <sup>4</sup>                           |          | 100    |
| Body mass (kg) <sup>5</sup>                                | Toddler  | 10     |

<sup>1</sup>Default values from ECHA Technical Notes for Guidance Part 2 (p. 257; in cases of non-professional use and residential exposure to biocides) [84]

<sup>2</sup>According to the Do-It-Yourself Products Fact Sheet (RIVM report 320104007/2007; assuming a fingertip surface area of 1 cm<sup>2</sup>) and utilising four fingers as a worst-case situation [85]

<sup>3</sup>Camann DE, Majumadar TK, and Geno P, 2000. Evaluation of Saliva and Artificial Salivary Fluids for Removal of Pesticide Residues from Human Skin. Final Report to EPA by ManTech (Contract 68-D5-0049) [86]

<sup>4</sup>TFT Assessment Report NL (2014) [44]

<sup>5</sup>Recommendation no. 14 of the BPC Ad hoc Working Group on Human Exposure—default values when assessing human exposure to biocidal products [40]
